# Supplementary material
Source: PubMed Central journal article supplement (PMC4302038)
Supplement: NIHMS621001-supplement-Supp_TableS1.pdf [file NIHMS621001-supplement-Supp_TableS1.pdf]

**Supplemental Table 1. Genes Regulated in the VTA by Morphine or Cocaine**

| <b>GENES DOWNREGULATED BY MORPHINE</b> |                    |                    |                     |
|----------------------------------------|--------------------|--------------------|---------------------|
| <b>Ref Seq</b>                         | <b>Gene Symbol</b> | <b>Fold Change</b> | <b>p adj. value</b> |
| NM_024283                              | 1500015O10Rik      | -1.41              | 0.05                |
| NM_027510                              | 3830403N18Rik      | -1.30              | 1.82E-03            |
| NM_009610                              | Actg2              | -1.47              | 9.47E-12            |
| NM_134149                              | Al837181           | -1.02              | 0.03                |
| NM_007442                              | Alx4               | -1.41              | 2.83E-03            |
| NM_007504                              | Atp2a1             | -0.98              | 0.01                |
| NM_016675                              | Cldn2              | -1.82              | 2.99E-03            |
| NM_007884                              | Epyc               | -0.96              | 0.03                |
| NM_010262                              | Gbx2               | -2.19              | 4.70E-07            |
| NR_003596                              | Gm6455             | -1.13              | 2.13E-04            |
| NM_010433                              | Hipk2              | -0.85              | 2.17E-04            |
| NM_016671                              | Il27ra             | -0.93              | 4.52E-03            |
| NM_011832                              | Insrr              | -1.33              | 3.95E-05            |
| NM_134110                              | Kcne2              | -2.65              | 3.01E-03            |
| NM_013823                              | Kl                 | -1.32              | 0.01                |
| NM_014194                              | Klra7              | -1.70              | 0.04                |
| NM_001025565                           | Lhx9               | -1.42              | 0.03                |
| NM_178440                              | Myo1g              | -0.91              | 1.57E-03            |
| NM_001011764                           | Olf106             | -1.74              | 0.03                |
| NM_011103                              | Prkcd              | -1.27              | 2.08E-08            |
| NM_053256                              | Pth2               | -2.56              | 4.12E-03            |
| NM_019511                              | Ramp3              | -1.26              | 4.24E-03            |
| NM_173184                              | Rln3               | -1.31              | 3.12E-03            |
| NM_013665                              | Shox2              | -1.47              | 2.11E-03            |
| NM_178387                              | Spata18            | -1.46              | 2.37E-03            |
| NM_027029                              | Spata3             | -1.45              | 9.34E-03            |
| NM_080451                              | Synpo2             | -0.94              | 0.01                |
| NM_177363                              | Tarm1              | -1.43              | 0.02                |
| NM_001142924                           | Tcf7l2             | -1.04              | 8.52E-05            |
| NM_026469                              | Tex13a             | -1.66              | 0.03                |
| NM_011618                              | Tnnt1              | -1.26              | 4.43E-03            |
| NM_022312                              | Tnr                | -0.72              | 6.35E-03            |
| NM_013697                              | Ttr                | -4.04              | 6.92E-158           |
| NM_172515                              | Zbbx               | -1.30              | 1.63E-03            |
| NM_009573                              | Zic1               | -0.84              | 0.04                |
| <b>GENES UPREGULATED BY MORPHINE</b>   |                    |                    |                     |
| <b>Ref Seq</b>                         | <b>Gene Symbol</b> | <b>Fold Change</b> | <b>p adj. value</b> |
| NM_025818                              | 1200014J11Rik      | 0.64               | 0.03                |
| NM_028096                              | 2010300C02Rik      | 1.50               | 2.01E-19            |
| NM_029809                              | 2310014L17Rik      | 2.19               | 1.05E-33            |
| NR_027901                              | 2900060B14Rik      | 1.76               | 5.11E-05            |
| NM_178399                              | 3110035E14Rik      | 0.73               | 0.02                |
| NM_001163356                           | 6530418L21Rik      | 0.81               | 0.04                |
| NM_175398                              | 6530418L21Rik      | 0.80               | 0.04                |

| Ref Seq      | Gene Symbol | Fold Change | p adj. value |
|--------------|-------------|-------------|--------------|
| NM_033268    | Actn2       | 1.31        | 1.64E-05     |
| NM_009630    | Adora2a     | 4.20        | 1.07E-80     |
| NM_007418    | Adra2c      | 1.01        | 1.57E-03     |
| NM_001101471 | Akap5       | 1.14        | 8.63E-09     |
| NM_027496    | Ankrd33b    | 2.05        | 1.77E-12     |
| NM_183173    | Ankrd43     | 1.07        | 3.67E-05     |
| NM_025404    | Arl4d       | 0.86        | 0.01         |
| NM_028755    | Arpp21      | 3.17        | 3.65E-134    |
| NM_007492    | Arx         | 1.84        | 4.09E-04     |
| NM_130862    | Baiap2      | 1.43        | 7.64E-22     |
| NR_003364    | BC018473    | 2.88        | 4.20E-132    |
| NM_016707    | Bcl11a      | 0.92        | 0.02         |
| NM_021399    | Bcl11b      | 2.41        | 1.27E-34     |
| NM_009792    | Camk2a      | 0.98        | 4.49E-06     |
| NM_145621    | Camkv       | 0.83        | 1.27E-03     |
| NM_178396    | Car12       | 1.04        | 0.01         |
| NM_013488    | Cd4         | 2.11        | 9.47E-12     |
| NM_033567    | Cecr6       | 0.99        | 6.01E-03     |
| NM_007698    | Chrm1       | 1.61        | 7.88E-16     |
| NM_007699    | Chrm4       | 1.93        | 7.00E-15     |
| NM_009933    | Col6a1      | 1.23        | 3.69E-08     |
| NM_146223    | Cplx3       | 1.97        | 7.96E-07     |
| NM_153166    | Cpne5       | 1.02        | 6.05E-06     |
| NM_016669    | Crym        | 3.55        | 8.05E-67     |
| NM_183315    | Ctxn1       | 1.05        | 4.80E-07     |
| NM_172928    | Dclk3       | 1.51        | 4.15E-14     |
| NM_001013741 | Ddn         | 3.58        | 8.39E-154    |
| NM_010054    | Dlx2        | 2.67        | 1.25E-04     |
| NM_198854    | Dlx5        | 3.73        | 2.03E-06     |
| NM_010057    | Dlx6        | 2.40        | 1.55E-06     |
| NR_015388    | Dlx6os1     | 3.36        | 4.62E-08     |
| NM_010076    | Drd1a       | 3.33        | 2.56E-36     |
| NM_018781    | Egr3        | 2.78        | 4.11E-21     |
| NM_020596    | Egr4        | 1.82        | 4.54E-04     |
| NM_001164225 | Fbxl16      | 0.86        | 3.77E-04     |
| NM_001081243 | Filip1      | 1.03        | 0.01         |
| NM_001160112 | Foxg1       | 3.03        | 3.33E-05     |
| NM_008072    | Gabrd       | 1.58        | 1.71E-08     |
| NM_010266    | Gda         | 1.70        | 1.14E-20     |
| NM_001081971 | Gm1337      | 7.20        | 5.93E-103    |
| NR_002173    | Gm5775      | 1.38        | 4.47E-08     |
| NM_001101584 | Gm6813      | 0.74        | 5.43E-04     |
| NM_001038655 | Gng7        | 1.89        | 6.69E-33     |
| NM_001146330 | Gpr52       | 1.30        | 4.30E-03     |
| NM_199058    | Gpr6        | 3.44        | 2.15E-35     |
| NM_001146005 | Gpr77       | 1.49        | 5.71E-04     |
| NM_022427    | Gpr88       | 3.97        | 8.90E-91     |
| NM_001130419 | Hpca        | 0.88        | 1.98E-04     |

| Ref Seq      | Gene Symbol | Fold Change | p adj. value |
|--------------|-------------|-------------|--------------|
| NM_174998    | Hpcal4      | 0.86        | 1.42E-04     |
| NM_007545    | Hrk         | 0.93        | 0.01         |
| NM_008319    | Icam5       | 2.09        | 3.12E-24     |
| NM_001161541 | Islr2       | 1.16        | 3.63E-05     |
| NM_146125    | Itpka       | 2.42        | 9.49E-26     |
| NM_010601    | Kcnh3       | 2.70        | 5.54E-27     |
| NM_030716    | Kcnp2       | 1.22        | 1.67E-03     |
| NM_008427    | Kcnj4       | 4.33        | 3.27E-80     |
| NM_026200    | Kcnv1       | 1.33        | 1.56E-04     |
| NM_134112    | Kctd1       | 0.75        | 0.05         |
| NM_201255    | Krt9        | 2.91        | 1.07E-18     |
| NM_001083125 | Lhx6        | 1.29        | 0.03         |
| NM_001013758 | Lingo3      | 0.77        | 0.03         |
| NM_201529    | Lmo7        | 0.87        | 5.47E-03     |
| NM_008509    | Lpl         | 0.87        | 0.02         |
| NM_001111140 | Lrrc10b     | 3.13        | 6.48E-27     |
| NM_028977    | Lrrc17      | 0.97        | 5.74E-09     |
| NM_199364    | Lzts1       | 1.44        | 1.70E-06     |
| NM_001159569 | Meis2       | 1.01        | 5.83E-06     |
| NR_030456    | Mir685      | 1.08        | 0.03         |
| NM_010865    | Myoc        | 2.20        | 2.92E-10     |
| NM_001111314 | Ngef        | 1.00        | 2.84E-06     |
| NM_010916    | Nhlh1       | 1.57        | 0.05         |
| NM_023456    | Npy         | 1.95        | 1.37E-08     |
| NM_022029    | Nrgn        | 1.72        | 1.90E-28     |
| NM_145598    | Nxn1        | 2.11        | 6.13E-24     |
| NM_146832    | Olf134      | 3.95        | 4.20E-03     |
| NM_153565    | Pcsk9       | 1.42        | 0.04         |
| NM_011866    | Pde10a      | 1.17        | 6.31E-12     |
| NM_008800    | Pde1b       | 0.69        | 0.02         |
| NM_001008548 | Pde2a       | 0.89        | 1.31E-04     |
| NM_018863    | Pdyn        | 2.25        | 1.07E-13     |
| NM_001002927 | Penk        | 1.74        | 8.09E-24     |
| NM_001005748 | Phactr1     | 0.80        | 1.05E-03     |
| NM_012045    | Pla2g2f     | 1.83        | 1.82E-04     |
| NM_020568    | Plin4       | 0.87        | 4.02E-03     |
| NM_152804    | Plk2        | 0.80        | 3.92E-03     |
| NM_144828    | Ppp1r1b     | 2.35        | 2.05E-164    |
| NM_172498    | Ptk2b       | 2.04        | 1.35E-46     |
| NM_139147    | Rab40b      | 1.20        | 2.24E-03     |
| NM_011243    | Rarb        | 0.93        | 0.01         |
| NM_029182    | Rasd2       | 1.21        | 9.74E-13     |
| NM_011246    | Rasgrp1     | 1.18        | 5.10E-09     |
| NM_080726    | Rem2        | 1.54        | 6.40E-06     |
| NM_016758    | Rgs14       | 1.96        | 1.75E-18     |
| NM_011268    | Rgs9        | 1.34        | 1.93E-11     |
| NM_145495    | Rin1        | 1.96        | 6.71E-17     |
| NR_001460    | Rmrp        | 1.18        | 1.51E-11     |

| Ref Seq             | Gene Symbol | Fold Change | p adj. value    |
|---------------------|-------------|-------------|-----------------|
| NR_002865           | Rnu11       | 2.85        | 6.84E-14        |
| NR_004432           | Rnu12       | 2.12        | 7.63E-67        |
| NR_024200           | Rnu1b2      | 1.90        | 3.58E-71        |
| NR_002142           | Rpph1       | 1.24        | 5.81E-12        |
| NM_001033212        | Rprml       | 2.51        | 3.45E-30        |
| NM_009107           | Rxrg        | 0.87        | 0.03            |
| NM_011681           | Scgb1a1     | 1.25        | 0.04            |
| NM_027997           | Serpina9    | 1.58        | 3.82E-05        |
| <b>NM_001161849</b> | <b>Sgk1</b> | <b>1.19</b> | <b>2.08E-14</b> |
| NM_172966           | Sh3rf2      | 2.71        | 2.65E-13        |
| NM_182993           | Slc17a7     | 2.17        | 4.69E-49        |
| NM_029529           | Slc35d3     | 1.32        | 1.11E-05        |
| NR_029412           | Snora16a    | 1.77        | 0.01            |
| NR_028571           | Snora17     | 1.57        | 0.04            |
| NR_028078           | Snora21     | 2.20        | 9.43E-05        |
| NR_033168           | Snora28     | 2.69        | 1.97E-14        |
| NR_028079           | Snora3      | 1.58        | 0.01            |
| NR_002898           | Snora65     | 1.74        | 1.36E-05        |
| NR_002901           | Snora68     | 1.76        | 2.56E-03        |
| NR_002899           | Snora70     | 2.27        | 1.25E-10        |
| NR_002905           | Snora74a    | 1.64        | 5.11E-08        |
| NR_028515           | Snora78     | 1.45        | 0.05            |
| NR_028546           | Snora7a     | 1.56        | 8.60E-05        |
| NR_030703           | Snord104    | 1.84        | 1.79E-23        |
| NR_028548           | Snord16a    | 2.36        | 1.76E-17        |
| NR_030762           | Snord17     | 1.24        | 1.62E-03        |
| NR_004445           | Snord22     | 1.35        | 2.66E-08        |
| NR_001277           | Snord33     | 1.66        | 3.47E-03        |
| NR_028550           | Snord49a    | 2.09        | 3.96E-10        |
| NR_030704           | Snord55     | 1.36        | 5.34E-04        |
| NR_002903           | Snord61     | 3.55        | 0.01            |
| NR_028553           | Snord67     | 1.96        | 1.63E-04        |
| NR_028542           | Snord8      | 1.82        | 8.30E-09        |
| NR_028282           | Snord83b    | 1.66        | 9.08E-04        |
| NR_028555           | Snord89     | 1.46        | 0.03            |
| NM_030176           | Spata2L     | 1.11        | 3.05E-03        |
| NM_009215           | Sst         | 0.81        | 5.80E-04        |
| NM_001109975        | Synpo       | 1.05        | 9.01E-04        |
| NM_001163032        | Synpr       | 0.89        | 5.66E-04        |
| NM_009311           | Tac1        | 1.10        | 8.99E-06        |
| NM_009322           | Tbr1        | 2.89        | 3.02E-22        |
| NM_001002267        | Tmem158     | 1.32        | 9.38E-12        |
| NM_001033334        | Tmem90a     | 0.85        | 2.51E-03        |
| NM_021278           | Tmsb4x      | 0.60        | 0.01            |
| NR_027885           | Vaultrc5    | 2.20        | 2.51E-19        |
| NM_011703           | Vipr1       | 1.22        | 0.01            |
| NM_011716           | Wfs1        | 0.88        | 4.58E-04        |
| NM_001167861        | Wipf3       | 0.96        | 1.85E-04        |

| Ref Seq      | Gene Symbol | Fold Change | p adj. value |
|--------------|-------------|-------------|--------------|
| NM_001099328 | Zfp831      | 1.77        | 1.91E-06     |

### GENES DOWNREGULATED BY COCAINE

| Ref Seq      | Gene Symbol   | Fold Change | p adj. value |
|--------------|---------------|-------------|--------------|
| NR_027901    | 2900060B14Rik | -3.34       | 1.33E-04     |
| NR_003364    | BC018473      | -2.09       | 9.39E-16     |
| NM_008072    | Gabrd         | -1.36       | 2.68E-03     |
| NM_010262    | Gbx2          | -1.72       | 4.92E-05     |
| NM_008117    | Gh            | -1.97       | 4.29E-15     |
| NM_175654    | Hist1h4d      | -2.52       | 0.02         |
| NM_134110    | Kcne2         | -2.12       | 0.01         |
| NM_001110227 | Kcnj13        | -1.66       | 0.03         |
| NM_013823    | Kl            | -1.35       | 0.01         |
| NR_030456    | Mir685        | -1.87       | 1.33E-03     |
| NM_011103    | Prkcd         | -1.12       | 6.89E-06     |
| NM_019511    | Ramp3         | -1.69       | 4.51E-07     |
| NM_173184    | Rln3          | -1.85       | 2.15E-09     |
| NR_001460    | Rmrp          | -2.21       | 5.28E-25     |
| NR_004432    | Rnu12         | -2.21       | 1.68E-08     |
| NR_024200    | Rnu1b2        | -1.80       | 2.86E-17     |
| NR_002142    | Rpph1         | -1.72       | 1.38E-10     |
| NR_028576    | Scarna13      | -2.18       | 1.61E-04     |
| NM_182993    | Slc17a7       | -1.44       | 3.77E-07     |
| NR_030703    | Snord104      | -2.02       | 9.76E-08     |
| NR_030762    | Snord17       | -2.29       | 1.52E-05     |
| NR_004445    | Snord22       | -1.75       | 5.74E-06     |
| NR_030704    | Snord55       | -2.45       | 2.85E-04     |
| NR_028542    | Snord8        | -3.01       | 4.47E-07     |
| NM_080451    | Synpo2        | -0.94       | 0.03         |
| NM_001142924 | Tcf7l2        | -0.90       | 5.48E-03     |
| NM_013697    | Ttr           | -5.43       | 9.67E-165    |
| NM_009573    | Zic1          | -1.21       | 7.24E-04     |

### GENES UPREGULATED BY COCAINE

| Ref Seq          | Gene Symbol | Fold Change | p adj. value |
|------------------|-------------|-------------|--------------|
| NM_028977        | Lrrc17      | 0.63        | 0.02         |
| NM_010865        | Myoc        | 2.03        | 1.08E-08     |
| NM_012045        | Pla2g2f     | 1.58        | 6.13E-03     |
| NM_020568        | Plin4       | 0.85        | 0.01         |
| <b>NM_011361</b> | <b>Sgk1</b> | <b>0.72</b> | <b>0.02</b>  |
